# Supplementary material
Source: publisher site journal article supplement (https://www.dovepress.com/article/561426)
Supplement: Supplementary file 1 [file 561426%20Revised%20%252509Supplementary%20material.docx]

Supplementary Table 1: STROBE Statement: Checklist of items that should be included in reports of *cross-sectional studies*

|  | Item No | Recommendation | Page |
| --- | --- | --- | --- |
| **Title and abstract** | 1 | (*a*) Indicate the study’s design with a commonly used term in the title or the abstract | 1 |
| (*b*) Provide in the abstract an informative and balanced summary of what was done and what was found | 3-4 |
| Introduction | | |  |
| Background/rationale | 2 | Explain the scientific background and rationale for the investigation being reported | 7-8 |
| Objectives | 3 | State specific objectives, including any prespecified hypotheses | 8 |
| Methods | | |  |
| Study design | 4 | Present key elements of study design early in the paper | 9-12 |
| Setting | 5 | Describe the setting, locations, and relevant dates, including periods of recruitment, exposure, follow-up, and data collection | 9 |
| Participants | 6 | (*a*) Give the eligibility criteria, and the sources and methods of selection of participants | 9 |
| Variables | 7 | Clearly define all outcomes, exposures, predictors, potential confounders, and effect modifiers. Give diagnostic criteria, if applicable | 10 |
| Data sources/ measurement | 8* | For each variable of interest, give sources of data and details of methods of assessment (measurement). Describe comparability of assessment methods if there is more than one group | 9, 11 |
| Bias | 9 | Describe any efforts to address potential sources of bias | 11 |
| Study size | 10 | Explain how the study size was arrived at | 9 and Refer to methodology paper |
| Quantitative variables | 11 | Explain how quantitative variables were handled in the analyses. If applicable, describe which groupings were chosen and why |  |
| Statistical methods | 12 | (*a*) Describe all statistical methods, including those used to control for confounding | 11 |
| (*b*) Describe any methods used to examine subgroups and interactions | 11 |
| (*c*) Explain how missing data were addressed | 11 |
| (*d*) If applicable, describe analytical methods taking account of sampling strategy | 11 |
| (*e*) Describe any sensitivity analyses |  |
| Results | | |  |
| Participants | 13* | (a) Report numbers of individuals at each stage of study—eg numbers potentially eligible, examined for eligibility, confirmed eligible, included in the study, completing follow-up, and analysed | 12 |
| (b) Give reasons for non-participation at each stage | Refer to methodology paper |
| (c) Consider use of a flow diagram | N/A |
| Descriptive data | 14* | (a) Give characteristics of study participants (eg demographic, clinical, social) and information on exposures and potential confounders | 12-14 |
| (b) Indicate number of participants with missing data for each variable of interest | 12 |
| Outcome data | 15* | Report numbers of outcome events or summary measures | 12-14 |
| Main results | 16 | (*a*) Give unadjusted estimates and, if applicable, confounder-adjusted estimates and their precision (eg, 95% confidence interval). Make clear which confounders were adjusted for and why they were included | 12-14 |
| (*b*) Report category boundaries when continuous variables were categorized | N/A |
| (*c*) If relevant, consider translating estimates of relative risk into absolute risk for a meaningful time period | N/A |
| Other analyses | 17 | Report other analyses done—eg analyses of subgroups and interactions, and sensitivity analyses | 13 |
| Discussion | | |  |
| Key results | 18 | Summarise key results with reference to study objectives | 15-16 |
| Limitations | 19 | Discuss limitations of the study, taking into account sources of potential bias or imprecision. Discuss both direction and magnitude of any potential bias | 17 |
| Interpretation | 20 | Give a cautious overall interpretation of results considering objectives, limitations, multiplicity of analyses, results from similar studies, and other relevant evidence | 15-17 |
| Generalisability | 21 | Discuss the generalisability (external validity) of the study results | 15-16 |
| Other information | | |  |
| Funding | 22 | Give the source of funding and the role of the funders for the present study and, if applicable, for the original study on which the present article is based | 20 |

*Give information separately for exposed and unexposed groups.

**Note:** An Explanation and Elaboration article discusses each checklist item and gives methodological background and published examples of transparent reporting. The STROBE checklist is best used in conjunction with this article (freely available on the Web sites of PLoS Medicine at http://www.plosmedicine.org/, Annals of Internal Medicine at http://www.annals.org/, and Epidemiology at http://www.epidem.com/). Information on the STROBE Initiative is available at [www.strobe-statement.org](http://www.strobe-statement.org).

| **Supplementary Table 2: Descriptive Statistics of the Spherical Equivalents (SEs) and Cylindrical (Cyl) Values of the Right and Left Eyes as Obtained by Visionix® in the Census-Adjusted TMES population** | | | | |
| --- | --- | --- | --- | --- |
|  | Right SE | Left SE | R Cyl | L Cyl |
| Valid Responses | 1707 | 1619 | 1707 | 1619 |
| Missing | 87 | 175 | 87 | 176 |
| Mean | 0.26 | 0.30 | -1.13 | -1.13 |
| Std. Error of Mean | 0.07 | 0.07 | 0.03 | 0.03 |
| Median | 0.56 | 0.60 | -0.83 | -0.82 |
| Mode | 0.70 | 0.04 | -0.31 | -0.53 |
| Std. Deviation | 2.91 | 2.93 | 1.14 | 1.05 |
| Variance | 8.46 | 8.57 | 1.30 | 1.11 |
| Skewness | -2.25 | -2.09 | -4.14 | -2.76 |
| Std. Error of Skewness | 0.06 | 0.06 | 0.06 | 0.06 |
| Kurtosis | 14.51 | 11.50 | 30.47 | 13.28 |
| Std. Error of Kurtosis | 0.12 | 0.12 | 0.12 | 0.12 |
| Range | 38.90 | 33.95 | 15.60 | 12.17 |
| Minimum | -28.14 | -25.18 | -15.63 | -12.19 |
| Maximum | 10.76 | 8.77 | -0.03 | -0.02 |
| 25th percentile | -0.63 | -0.54 | -1.39 | -1.43 |
| 50th percentile | 0.56 | 0.60 | -0.83 | -0.82 |
| 75th percentile | 1.70 | 1.70 | -0.48 | -0.46 |
| Kolmogrov Smirnov p | <0.001 | <0.001 | <0.001 | <0.001 |

| **Supplementary Table 3: Census age-adjusted prevalence of current refractive errors, as detected by Visionix® Autorefractor, by laterality of eyes amongst all TMES individuals, irrespective of surgical history** | | | | | |
| --- | --- | --- | --- | --- | --- |
|  | **Valid Responses** | **Frequency** | **Percentage (%)** | **Lower 95% CI** | **Upper 95% CI** |
| **Right Emmetropic** | 1707 | 377 | 22.1% | 20.1% | 24.1% |
| **Right Myopic** | 1707 | 450 | 26.4% | 24.3% | 28.5% |
| **Right Low Myopia** | 1707 | 297 | 17.4% | 15.6% | 19.3% |
| **Right Moderate Myopia** | 1707 | 103 | 6.0% | 5.0% | 7.3% |
| **Right High Myopia** | 1707 | 50 | 2.9% | 2.2% | 3.8% |
| **Right Hyperopic** | 1707 | 880 | 51.6% | 49.2% | 53.9% |
| **Right Low Hyperopia** | 1707 | 548 | 32.1% | 29.9% | 34.4% |
| **Right Moderate Hyperopia** | 1707 | 285 | 16.7% | 15.0% | 18.6% |
| **Right High Hyperopia** | 1707 | 48 | 2.8% | 2.1% | 3.7% |
| **Right Astigmatism** | 1707 | 948 | 55.5% | 53.1% | 57.9% |
| **Right With the Rule Astigmatism** | 1707 | 171 | 10.0% | 8.6% | 11.5% |
| **Right Against The Rule Astigmatism** | 1707 | 498 | 29.2% | 27.0% | 31.4% |
| **Right Oblique Astigmatism** | 1707 | 279 | 16.3% | 14.6% | 18.2% |
| **Left Emmetropic** | 1619 | 366 | 22.6% | 20.6% | 24.7% |
| **Left Myopic** | 1619 | 414 | 25.6% | 23.5% | 27.8% |
| **Left Low Myopia** | 1619 | 247 | 15.3% | 13.5% | 17.1% |
| **Left Moderate Myopia** | 1619 | 91 | 5.6% | 4.5% | 6.9% |
| **Left High Myopia** | 1619 | 50 | 3.1% | 2.3% | 4.1% |
| **Left Hyperopic** | 1619 | 839 | 51.8% | 49.4% | 54.3% |
| **Left Low Hyperopia** | 1619 | 510 | 31.5% | 29.2% | 33.8% |
| **Left Moderate Hyperopia** | 1619 | 286 | 17.7% | 15.8% | 19.6% |
| **Left High Hyperopia** | 1619 | 42 | 2.6% | 1.9% | 3.5% |
| **Left Astigmatism** | 1619 | 890 | 55.0% | 52.5% | 57.4% |
| **Left With the Rule Astigmatism** | 1619 | 195 | 12.0% | 10.5% | 13.7% |
| **Left Against The Rule Astigmatism** | 1619 | 432 | 26.7% | 24.5% | 28.9% |
| **Left Oblique Astigmatism** | 1619 | 264 | 16.3% | 14.5% | 18.2% |
| **Anisometropia** | 1590 | 383 | 24.1% | 22.0% | 26.3% |

| **Supplementary Table 4: Prevalence of Refractive Error Groups Among Census Adjusted TMES Population categorised by whether they ever had surgical procedures or not.** | | | | | | | | | | | | |
| --- | --- | --- | --- | --- | --- | --- | --- | --- | --- | --- | --- | --- |
|  | **Phakic, Surgically Untouched Right Eyes**  **n= 1523** | | | **Phakic, Surgically Untouched Left Eyes**  **n= 1446** | | | **No keratorefractive Surgical History** | | | **Keratorefractive Surgical History**  **n=20** | | |
| **Bilateral Pseudophakia**  **n=111** | | |
| **%** | **L95% CI** | **U95% CI** | **%** | **L95% CI** | **U95% CI** | **%** | **L95% CI** | **U95% CI** | **%** | **L95% CI** | **U95% CI** |
| **Emmetropia** | **20.0%** | 18.0% | 22.1% | **20.1%** | 18.1% | 22.3% | **39.6%** | 30.5% | 49.4% | **25.0%** | 8.7% | 49.1% |
| **Myopia** | **25.1%** | 23.0% | 27.4% | **24.7%** | 22.5% | 27.0% | **35.1%** | 26.3% | 44.8% | **40.0%** | 19.1% | 63.9% |
| **Hyperopia** | **54.8%** | 52.3% | 57.3% | **55.2%** | 52.6% | 57.8% | **25.2%** | 17.5% | 34.4% | **40.0%** | 19.1% | 63.9% |
| **Mild myopia** | **15.8%** | 14.0% | 17.8% | **15.6%** | 13.8% | 17.6% | **33.3%** | 24.7% | 42.9% | **25.0%** | 8.7% | 49.1% |
| **Moderate myopia** | **6.3%** | 5.1% | 7.6% | **5.9%** | 4.8% | 7.3% | **1.8%** | 0.2% | 6.4% | **10.0%** | 1.2% | 31.7% |
| **High myopia** | **3.0%** | 2.2% | 4.0% | **3.1%** | 2.3% | 4.1% | **0.0%** | 0.0% | 3.3% | **5.0%** | 0.1% | 24.9% |
| **Mild hyperopia** | **33.2%** | 30.8% | 35.6% | **32.7%** | 30.3% | 35.2% | **24.3%** | 16.7% | 33.4% | **40.0%** | 19.1% | 63.9% |
| **Moderate hyperopia** | **18.6%** | 16.7% | 20.6% | **19.6%** | 17.6% | 21.7% | **0.9%** | 0.0% | 4.9% | **0.0%** | 0.0% | 16.8% |
| **High hyperopia** | **3.1%** | 2.3% | 4.1% | **2.9%** | 2.1% | 3.9% | **0.0%** | 0.0% | 3.3% | **0.0%** | 0.0% | 16.8% |
| The laterality of the refractive statuses is of the eye in question for the surgically untouched phakic eyes while the right refractive status is provided for the bilateral pseudophakia group and the keratorefractive surgical history group. Amongst those with keratorefractive surgery, 4 had bilateral pseudophakia and 1 had unilateral pseudophakia. The spherical equivalents to determine the refractive error groups were obtained from measurements by Visionix®. | | | | | | | | | | | | |

| **Supplementary Table 5: Comparison of the Proportion of Myopic Macular Degeneration (MMD) and META-PM, 32** **Categories 2–4 among High Myopia Subjects (defined as average eye spherical equivalent ≤ –6.00 D or axial length > 26 mm) in the Combined Cohort of the Rotterdam Study and Myopia Study (MYST), 36 versus High Myopia Subjects (average eye spherical equivalent ≤ –6.00 D) in TMES (age-standardised to the combined cohort)** | | | | | | | |
| --- | --- | --- | --- | --- | --- | --- | --- |
|  | **Age Group** | **Combined Rotterdam Study and MYST, n=327** | | | **TMES, n=43** | | |
| **%** | **L95% CI** | **U95% CI** | **%** | **L95% CI** | **U95% CI** |
| **MMD**  **(Categories 2-4)** | **50-59** | 24.5% | 18.1% | 31.9% | 20.0% | 5.7% | 43.7% |
| **60-69** | 35.2% | 26.2% | 45.0% | 46.7% | 21.3% | 73.4% |
| **70-79** | 46.4% | 33.0% | 60.3% | 37.5% | 8.5% | 75.5% |
| **Total** | 31.8% | 26.8% | 37.2% | 32.6% | 19.1% | 48.5% |
| **Category 2**  **Diffuse Choroidal Atrophy** | **50-59** | 16.6% | 11.2% | 23.2% | 15.0% | 3.2% | 37.9% |
| **60-69** | 22.2% | 14.8% | 31.2% | 13.3% | 1.7% | 40.5% |
| **70-79** | 35.7% | 23.4% | 49.6% | 0.0% | 0.0% | 36.9% |
| **Total** | 21.7% | 17.4% | 26.6% | 11.6% | 3.9% | 25.1% |
| **Category 3**  **Patchy Choroidal Atrophy** | **50-59** | 2.5% | 0.7% | 6.2% | 0.0% | 0.0% | 16.8% |
| **60-69** | 5.6% | 2.1% | 11.7% | 13.3% | 1.7% | 40.5% |
| **70-79** | 1.8% | 0.0% | 9.6% | 12.5% | 0.3% | 52.7% |
| **Total** | 3.4% | 1.7% | 5.9% | 7.0% | 1.5% | 19.1% |
| **Category 4**  **Macular Atrophy** | **50-59** | 4.9% | 2.1% | 9.4% | 5.0% | 0.1% | 24.9% |
| **60-69** | 7.4% | 3.3% | 14.1% | 20.0% | 4.3% | 48.1% |
| **70-79** | 7.1% | 2.0% | 17.3% | 25.0% | 3.2% | 65.1% |
| **Total** | 6.1% | 3.8% | 9.3% | 14.0% | 5.3% | 27.9% |

| **Supplementary Table 6: Multinomial logistic regression analysis of associations of myopia and hyperopia (vs. emmetropia) in the census-adjusted TMES population of individuals with surgically untouched right eyes** | | | | | | | | | | |
| --- | --- | --- | --- | --- | --- | --- | --- | --- | --- | --- |
| **Variable** | **Reference** | **Category** | **Myopia vs Emmetropia** | | | | **Hyperopia vs Emmetropia** | | | |
| **Odds Ratio** | | | **p** | **Odds Ratio** | | | **p** |
| **OR** | **L95% CI** | **U95% CI** | **OR** | **L95% CI** | **U95% CI** |
| **Education Level** | **Primary Level** | **Secondary Level** | 1.56 | 0.98 | 2.49 | 0.059 | 1.15 | 0.81 | 1.64 | 0.445 |
| **Tertiary Level** | 2.35 | 1.50 | 3.69 | **<0.001** | 0.66 | 0.46 | 0.95 | **0.027** |
| **Sunglasses Wear** | **-** | **+** | 0.49 | 0.33 | 0.74 | **0.001** | 0.60 | 0.42 | 0.86 | **0.006** |
| **Anisometropia** | **-** | **+** | 3.22 | 2.09 | 4.95 | **<0.001** | 1.38 | 0.92 | 2.07 | 0.115 |
| **Peripapillary Atrophy** | **-** | **+** | 7.30 | 3.41 | 15.63 | **<0.001** | 0.82 | 0.35 | 1.90 | 0.639 |
| Numerical figures in bold signify p<0.050 | | | | | | | | | | |

| **Supplementary Table 7: Binary logistic regression analysis of associations of astigmatism (vs. no astigmatism) in the census-adjusted TMES population of individuals with surgically untouched eyes — based on the average of both eyes** | | | | | | | |
| --- | --- | --- | --- | --- | --- | --- | --- |
| **Variable** | **Reference Group** | **Category** | **Astigmatism vs No Astigmatism** | | | | |
| **Odds Ratio** | | | **p** | |
| **OR** | **L95% CI** | **U95% CI** |
| **Age*** | **N/A** | **N/A** | 1.04* | 1.03 | 1.06 | **<0.001** |  |
| **Gender** | **Male** | **Female** | 0.69 | 0.55 | 0.86 | **0.001** |  |
| **VI categories** | **No VI** | **mild VIOU** | 1.89 | 1.05 | 3.38 | **0.033** | **0.014** |
| **MSVI OU** | 2.78 | 0.83 | 9.25 | 0.097 |
| **mild unilateral VI** | 1.47 | 1.01 | 2.15 | **0.044** |
| **Unilateral MSVI** | 2.13 | 1.11 | 4.08 | **0.023** |
| **Unilateral Blindness** | 1.11 | 0.49 | 2.48 | 0.808 |
| **Cortical Lens Opacities** | **-** | **+** | 1.51 | 1.09 | 2.10 | **0.014** |  |
| **Anisometropia** | **-** | **+** | 2.08 | 1.56 | 2.78 | **<0.001** |  |
| * OR of Age is per year  Numerical figures in bold signify p<0.050 | | | | | | | |

| **Supplementary Table 8: Binary logistic regression analysis of associations of anisometropia (vs. no anisometropia) in the census-adjusted TMES population of individuals with surgically untouched eyes bilaterally** | | | | | | | |
| --- | --- | --- | --- | --- | --- | --- | --- |
| **Demographic Variable** | **Reference Group** | **Category** | **Anisometropia vs No Anisometropia** | | | | |
| **Odds Ratio** | | | **P value** | |
| **OR** | **L95% CI** | **U95% CI** |
| **VI category** | **No VI** | **Mild VIOU** | 1.71 | 0.88 | 3.30 | **0.111** | **<0.001** |
| **MSVI OU** | 2.52 | 0.83 | 7.63 | 0.103 |
| **Mild unilateral VI** | 2.36 | 1.56 | 3.58 | **<0.001** |
| **Unilateral MSVI** | 29.14 | 13.09 | 64.85 | **<0.001** |
| **Unilateral Blindness** | 15.83 | 6.09 | 41.15 | **<0.001** |
| **Astigmatism** | **No Astigmatism** | **WTR** | 1.66 | 1.07 | 2.57 | **0.023** | **<0.001** |
| **ATR** | 2.07 | 1.49 | 2.86 | **<0.001** |
| **Oblique** | 2.99 | 1.64 | 5.46 | **<0.001** |
| **Right Refractive Status** | **Emmetropia** | **Hyperopia** | 1.16 | 0.76 | 1.77 | 0.482 | **<0.001** |
| **Myopia** | 3.31 | 2.14 | 5.13 | **<0.001** |
| Numerical figures in bold signify p<0.050 | | | | | | | |

| **Supplementary Table 9 – Binary Logistic Regression Analysis of Associations of Myopic Macular Degeneration (MMD) with Reference to No MMD** | | | | | | |
| --- | --- | --- | --- | --- | --- | --- |
| **Variable** | **Reference Group** | **Category** | **MMD vs No MMD** | | | |
| **Odds Ratio** | | | **p** |
| **OR** | **L95% CI** | **U95% CI** |
| **Employment Status** | **Employed** | **Retired** | 2.95 | 0.97 | 8.95 | 0.056 |
| **Domestic Work** | 4.52 | 1.13 | 18.18 | **0.034** |
| **Hat Wearing** | **-** | **+** | 0.20 | 0.07 | 0.53 | **0.001** |
| **Long-Acting Anti Muscarinic** | **-** | **+** | 25.70 | 1.55 | 426.04 | **0.023** |
| **VI subgroups** | **No VI** | **Mild VIOU** | 6.94 | 1.47 | 32.81 | **0.015** |
| **MSVI OU** | 2.44 | 0.25 | 24.23 | 0.445 |
| **mild Unilateral VI** | 2.44 | 0.67 | 8.89 | 0.178 |
| **Unilateral MSVI** | 5.38 | 1.35 | 21.48 | **0.017** |
| **Unilateral Blindness** | 12.43 | 2.87 | 53.71 | **0.001** |
| **Peripapillary Atrophy** | **-** | **+** | 20.60 | 7.39 | 57.37 | **<0.001** |
| **Right Refractive Status** | **Emmetropia** | **mild myopia** | 12.98 | 0.83 | 202.00 | 0.067 |
| **moderate myopia** | 27.88 | 1.71 | 455.47 | **0.020** |
| **high myopia** | 65.67 | 3.77 | 1145.66 | **0.004** |
| **mild hyperopia** | 2.44 | 0.13 | 47.60 | 0.557 |
| **moderate hyperopia** | 1.99 | 0.06 | 65.24 | 0.701 |
| Numerical figures in bold signify p<0.050 | | | | | | |

| **Supplementary Table 10: Distance and Near Effective Refractive Error Coverage (eREC) by Age and Gender in TMES’ population** | | | | | | | | | | | | | |
| --- | --- | --- | --- | --- | --- | --- | --- | --- | --- | --- | --- | --- | --- |
|  |  | **Distance Refractive Error** | | | | | | **Near Refractive Error** | | | | | |
| **Age Group** | **Gender** | **a** | **b** | **c** | **Distance eREC** | **L95% CI** | **U95%CI** | **d** | **e** | **f** | **Near eREC** | **L95% CI** | **U95%CI** |
| **50-59** | **Male** | 150 | 2 | 9 | 93.2% | 88.1% | 96.5% | 69 | 1 | 0 | 98.6% | 92.3% | 100.0% |
| **Female** | 134 | 3 | 6 | 93.7% | 88.4% | 97.1% | 88 | 4 | 1 | 94.6% | 87.9% | 98.2% |
| **Total** | 284 | 5 | 15 | 93.4% | 90.0% | 95.9% | 157 | 5 | 1 | 96.3% | 92.2% | 98.6% |
| **60-69** | **Male** | 161 | 1 | 5 | 96.4% | 92.3% | 98.7% | 72 | 1 | 5 | 92.3% | 84.0% | 97.1% |
| **Female** | 170 | 4 | 14 | 90.4% | 85.3% | 94.2% | 98 | 0 | 7 | 93.3% | 86.7% | 97.3% |
| **Total** | 331 | 5 | 19 | 93.2% | 90.1% | 95.6% | 170 | 1 | 12 | 92.9% | 88.2% | 96.2% |
| **70-80** | **Male** | 128 | 5 | 8 | 90.8% | 84.7% | 95.0% | 62 | 0 | 8 | 88.6% | 78.7% | 94.9% |
| **Female** | 135 | 3 | 8 | 92.5% | 86.9% | 96.2% | 85 | 1 | 4 | 94.4% | 87.5% | 98.2% |
| **Total** | 263 | 8 | 16 | 91.6% | 87.8% | 94.6% | 147 | 1 | 12 | 91.9% | 86.5% | 95.6% |
| **All ages** | **Male** | 439 | 8 | 22 | 93.6% | 91.0% | 95.6% | 203 | 2 | 13 | 93.1% | 88.9% | 96.1% |
| **Female** | 439 | 10 | 28 | 92.0% | 89.2% | 94.3% | 271 | 5 | 12 | 94.1% | 90.7% | 96.5% |
| **Total** | 878 | 18 | 50 | 92.8% | 91.0% | 94.4% | 474 | 7 | 25 | 93.7% | 91.2% | 95.6% |
| For Distance Refractive Error:  a=individuals who present with spectacles or contact lenses for distance (or have a history of refractive surgery) and whose presenting VA is ≥6/12 in the better eye (met need)  b=individuals who present with spectacles or contact lenses for distance (or have a history of refractive surgery) and whose presenting VA was <6/12 in the better eye, but who improve to ≥6/12 on pinhole or refraction (undermet need)  c=individuals with presenting VA <6/12 in the better eye who do not have correction and who improve to ≥6/12 on pinhole or refraction (unmet need)  Distance eREC= a/a+b+c  For Near Refractive Error:  d=individuals who present with spectacles for near (or have a history of multifocal implants) and whose presenting near VA is ≥N6 (met need)  e=individuals who present with spectacles for near (or have a history of multifocal implants) and whose presenting near VA was <N6, but who improve to ≥N6 with refraction (undermet need)  f=individuals with presenting near VA <N6 who do not have correction and who improve to ≥N6 with refraction (unmet need)  Near eREC= d/d+e+f | | | | | | | | | | | | | |

| **Supplementary Figure 1: Prevalence rates of anisometropia amongst the surgically untouched, phakic eyes of individuals in the census-adjusted TMES population, stratified by age group and gender.** |
| --- |
|  |

| **Supplementary Figure 2: Prevalence rates of low, moderate and high myopia in the surgically untouched, phakic right eyes of individuals in the census-adjusted TMES population, stratified by age group and gender.** |
| --- |
|  |

| **Supplementary Figure 3: Prevalence rates of low, moderate and high hyperopia in the surgically untouched, phakic right eyes of individuals in the census-adjusted TMES population, stratified by age group and gender.** |
| --- |
|  |

| **Supplementary Figure 4: Prevalence rates of vector-analysed averaged astigmatism in the surgically untouched, phakic eyes of individuals in the census-adjusted TMES population, stratified by age group and gender.** |
| --- |
|  |

| **Supplementary Figure 5: Line chart demonstrating the average corneal astigmatism value (with 95%CI bars) in the average eye of the phakic surgically untouched age-standardised TMES population, stratified by 5-year age groups** |
| --- |
|  |

| **Supplementary Figure 6: Prevalence rates of myopic macular degeneration (MMD)amongst individuals in the census-adjusted TMES population, stratified by age group and gender.** |
| --- |
|  |

| **Supplementary Figure 7: Line chart comparing the rates of low myopia (with 95%CI bars), defined as an average spherical equivalent of ≤-0.75D to >3.00D between both eyes, in phakic individuals without a history of retinal detachment or refractive surgery, between the E3 Consortium, 11 and the age-standardised TMES population, stratified by 5-year age groups.** |
| --- |
|  |

| **Supplementary Figure 8: Line chart comparing the rates of moderate myopia (with 95%CI bars), defined as an average spherical equivalent of ≤-3.00D to >6.00D between both eyes, in phakic individuals without a history of retinal detachment or refractive surgery, between the E3 Consortium, 11 and the age-standardised TMES population, stratified by 5-year age groups.** |
| --- |
|  |

| **Supplementary Figure 9: Line chart comparing the rates of high myopia (with 95%CI bars), defined as an average spherical equivalent of ≤-6.00D between both eyes, in phakic individuals without a history of retinal detachment or refractive surgery, between the E3, 11 and the age-standardised TMES population, stratified by 5-year age groups.** |
| --- |
|  |

| **Supplementary Figure 10: Line chart comparing the rates of high hyperopia (with 95%CI bars), defined as an average spherical equivalent of ≥+3.00D between both eyes, in phakic individuals without a history of retinal detachment or refractive surgery, between the E3, 11 and the age-standardised TMES population, stratified by 5-year age groups.** | |
| --- | --- |
|  | |
| **Supplementary Figure 11: Line chart comparing the rates of astigmatism (with 95%CI bars), defined as an average astigmatism of ≥+1.00D between both eyes, in phakic individuals without a history of retinal detachment or refractive surgery, between the E3 Consortium, 11 and the age-standardised TMES population, stratified by 5-year age groups.** | |
|  | |
| For this comparison, TMES’ astigmatism was considered a case when the derived astigmatism from the average J0 and J45 vectors was ≥+1.00D. | |
